# Supplementary material for: Mental Health Inequities among Transgender People in Aotearoa New Zealand: Findings from the Counting Ourselves Survey
Source: PubMed Central journal article supplement (PMC7216046; doi:10.3390/ijerph17082862), 2020-04-21
Supplement: ijerph-17-02862-s001.pdf [file ijerph-17-02862-s001.pdf]

**Table S1.** Regression analyses of gender and age on mental health variables among Counting Ourselves age 14+ participants.

| Variables           | Depression diagnosis |                   | Anxiety diagnosis |                   |
|---------------------|----------------------|-------------------|-------------------|-------------------|
|                     | Age-int Model        |                   | Age-int Model     |                   |
|                     | Wald statistics      | OR (95% CI)       | Wald statistics   | OR (95% CI)       |
| <b>Age</b>          | 3.57                 | 0.99 (0.97, 1.00) | 9.97 **           | 0.97 (0.96, 0.99) |
| <b>Gender</b>       | 0.42                 |                   | 1.26              |                   |
| Trans women         |                      | 1.00 (ref)        |                   | 1.00 (ref)        |
| Trans men           | 0.37                 | 0.73 (0.27, 1.99) | 0.89              | 1.59 (0.61, 4.16) |
| Non-binary          | 0.22                 | 0.81 (0.34, 1.94) | 1.01              | 1.56 (0.66, 3.73) |
| <b>Gender x Age</b> | 3.69                 |                   | 0.69              |                   |
| Trans women         |                      | 1.00 (ref)        |                   | 1.00 (ref)        |
| Trans men           | 2.96                 | 1.03 (1.00, 1.06) | 0.62              | 1.01 (0.98, 1.04) |
| Non-binary          | 1.67                 | 1.02 (0.99, 1.04) | 0.28              | 1.01 (0.98, 1.03) |

Trans women were used as a reference group for comparison. Age-int model = Regression models examining the interaction effect of age and gender groups.

Significant difference \*  $p < 0.05$  \*\*  $p < 0.01$

**Table S2.** Regression analyses of number of years living in affirmed gender, gender, and age on mental health variables among Counting Ourselves age 14+ trans men and trans women participants.

| Variables                       | Depression      |                   | Anxiety         |                   | K10             |                      |                 |                      |
|---------------------------------|-----------------|-------------------|-----------------|-------------------|-----------------|----------------------|-----------------|----------------------|
|                                 | Age-adj Model   |                   | Age-adj Model   |                   | Age-adj Model   |                      | Age-int Model   |                      |
|                                 | Wald statistics | OR (95% CI)       | Wald Statistics | OR (95% CI)       | Wald Statistics | B (95% CI)           | Wald Statistics | B (95% CI)           |
| Age                             | 0.23            | 1.00 (0.98, 1.01) | 5.66 *          | 0.98 (0.96, 1.00) | 31.44 **        | -0.22 (-0.30, -0.15) | 16.45 **        | -0.18 (-0.27, -0.09) |
| Years living in affirmed gender | 0.55            | 0.99 (0.96, 1.02) | 1.20            | 0.98 (0.94, 1.02) | 1.97            | -0.10 (-0.25, 0.04)  | 1.63            | -0.09 (-0.24, 0.05)  |
| Gender <sup>a</sup>             | 8.48 **         | 2.09 (1.27, 3.43) | 13.31 **        | 2.38 (1.50, 3.80) | 0.01            | -0.09 (-2.12, 1.93)  | 3.63            | 4.75 (-0.14, 9.63)   |
| Gender x Age <sup>a</sup>       | -               | -                 | -               | -                 | -               | -                    | 4.55 *          | -0.16 (-0.31, -0.01) |

Number of years since living in affirmed gender was calculated with the equation “current age - age of first started living as a woman or man”. We did not ask non-binary participants their age of first living in affirmed gender so we could not calculate the number of years of living in affirmed gender for this gender group. <sup>a</sup>Trans women were used as a reference group for comparison. Age-adj model = Regression models adjusted for the effects of age. Age-int model = Regression models examining the interaction effect of age and gender groups.

Significant difference \*  $p < 0.05$  \*\*  $p < 0.01$
